# Supplementary material for: Characterization of calcite spines of planktonic foraminifers (Globigerinidae)
Source: Royal Society of Chemistry journal article supplement (doi:10.1039/d2ce00110a), 2022-01-01
Supplement: d2ce00110a1.pdf [file d2ce00110a1.pdf]

## **Characterization of Calcite Spines of Planktonic Foraminifers (Globigerinidae)**

Kenta Izumida,<sup>a</sup> Mihiro Takasaki,<sup>a</sup> Rina Fujimaki,<sup>a</sup> Yukiko Nagai,<sup>b,c</sup> Yuya Oaki,<sup>a</sup> Kimiyoshi Naito,<sup>d</sup> Yoshihisa Tanaka,<sup>d</sup> Shinji Shimode,<sup>e</sup> Takashi Toyofuku<sup>c</sup> and Hiroaki Imai<sup>\*a</sup>

<sup>a</sup>*Department of Applied Chemistry, Faculty of Science and Technology, Keio University, 3-14-1 Hiyoshi, Kohoku-ku, Yokohama 223-8522, Japan.*

<sup>\*</sup>E-mail: hiroaki@applc.keio.ac.jp

<sup>b</sup>*National Museum of Nature and Science, 7-20 Uenokoen, Taito-ku, Tokyo 110-8718.*

<sup>c</sup>*X-star, Japan Agency for Marine-Earth Science and Technology (JAMSTEC), Natsushima-cho 2-15, Yokosuka 237-0061, Japan.*

<sup>d</sup>*National Institute for Materials Science, 1-2-1 Sengen, Tsukuba 305-0047, Japan.*

<sup>e</sup>*Manazuru Marine Center for Environmental Research and Education, Graduate School of Environment and Information Sciences, Yokohama National University, 61 Iwa, Manazuru 259-0202, Japan.*

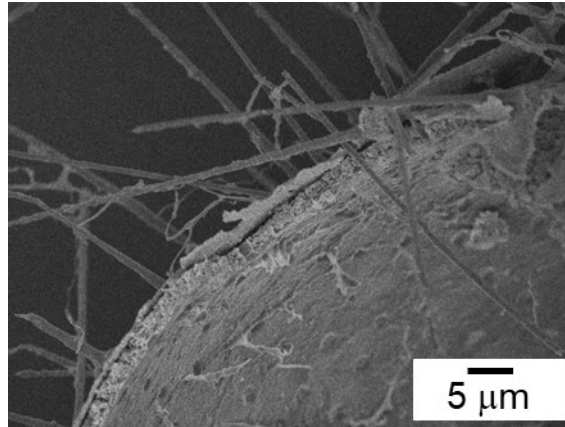

Figure S1. SEM image of the cross section of a test of a planktonic foraminifer.

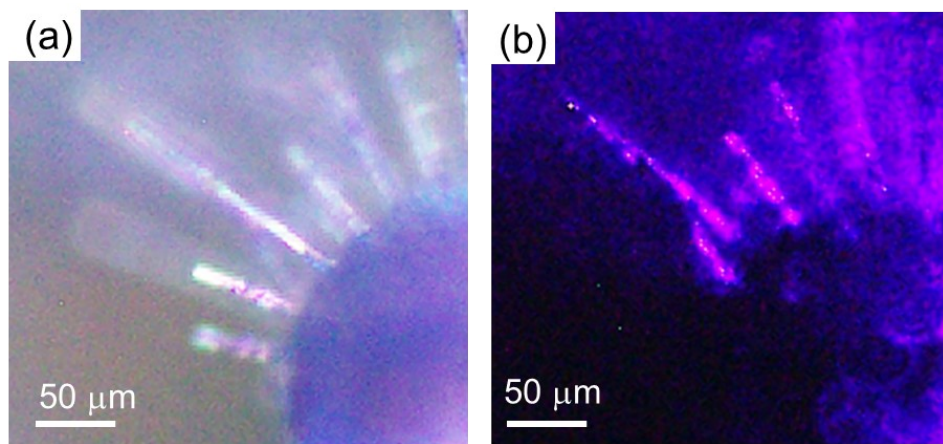

Figure S2. Fluorescence microscope images of spines stained with Calcofluor White Stain (Sigma Aldrich) (a) under natural light and (b) ultraviolet illumination (400 nm). Calcofluor White Stain is non-specific fluorochrome that binds with cellulose and chitin contained cell walls. We confirmed that the spines yielded fluorescence after addition of one drop of Calcofluor White Stain.

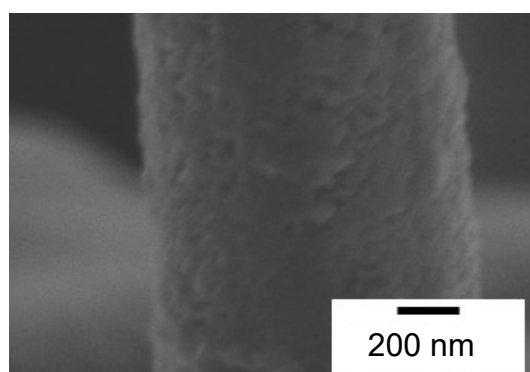

Figure S3. SEM image of a spine after the NaClO treatment for 12 h. The surface organic membrane was removed and the granular structure then appeared after 12 h.

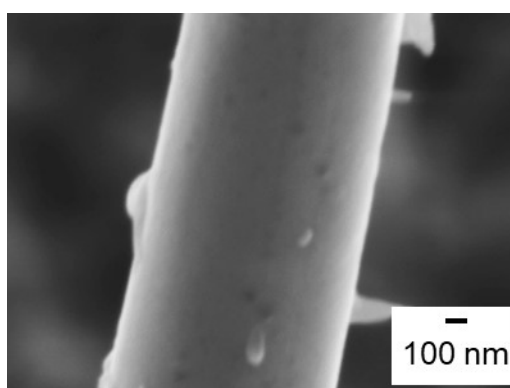

Figure S4. SEM image of a spine without removal of an organic membrane after the immersion in the supersaturated solution.

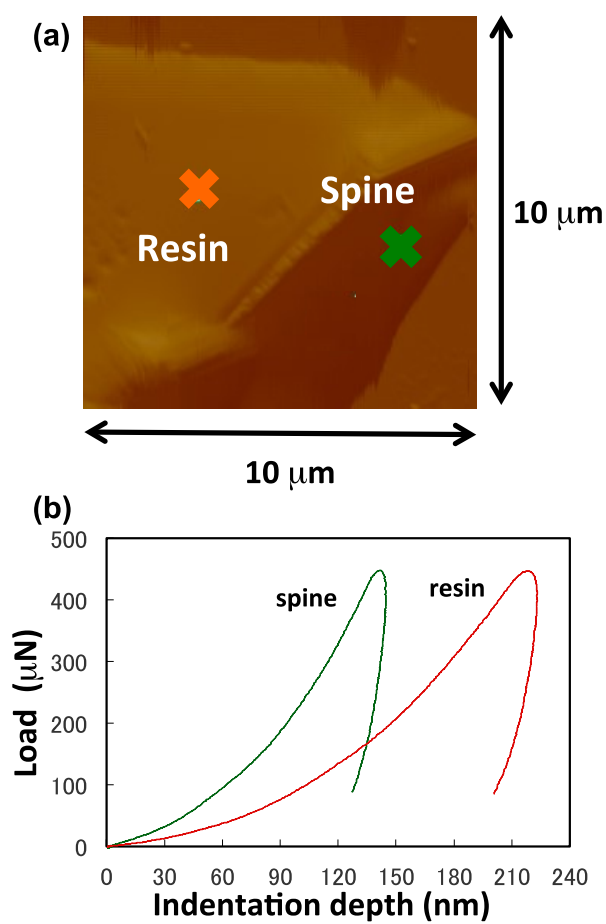

Figure S5. An optical micrograph and typical loading and unloading curves of the indentation test for a spine and resin supporting the sample.
